# Supplementary material
Source: Springer Nature journal article supplement (https://www.springermedizin.de/resource/supplementary/12877_2010_779_MOESM4_ESM.pdf/9440264)

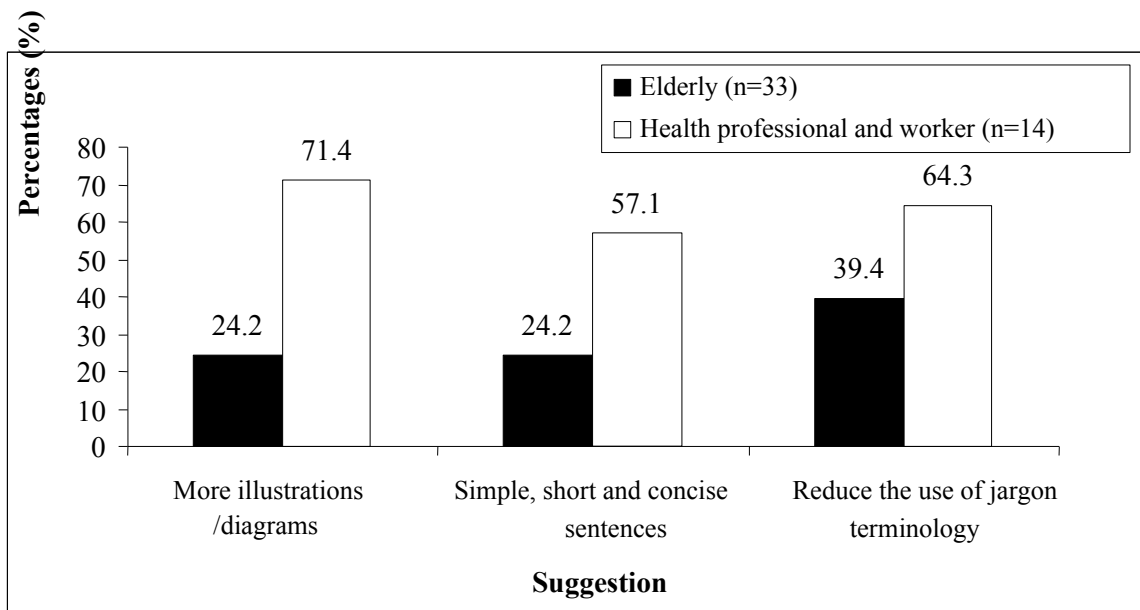

<sup>a</sup>Cummulative percentages more than 100% as subjects may have multiple answers

Supplement: MOESM4 [file 9440264]
